# Supplementary material for: The H1 histamine receptor regulates allergic lung responses
Source: JCI journal article supplement (doi:10.1172/jci26150), 2006-05-04
Supplement: sd1 [file 1]

Supplemental Figure 1

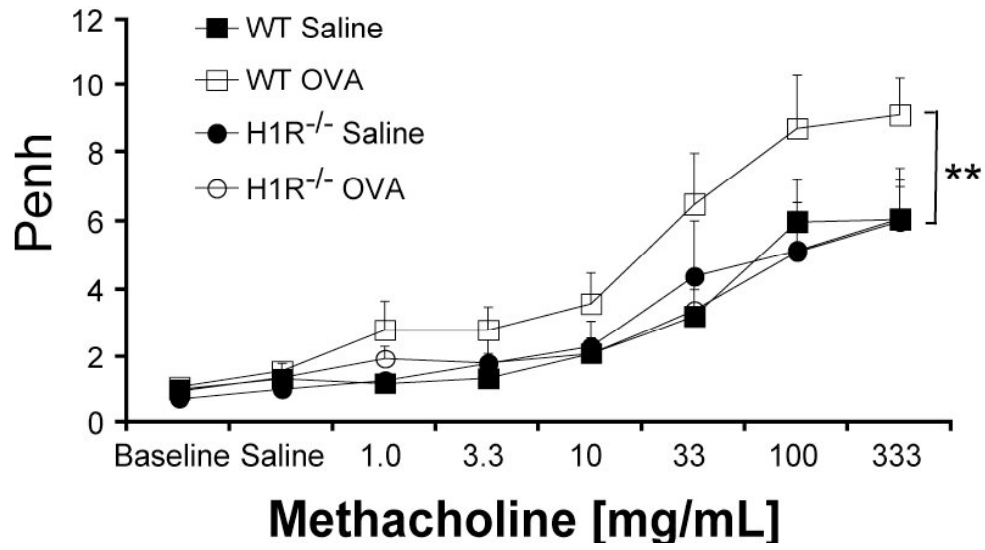

Supplemental Figure 2

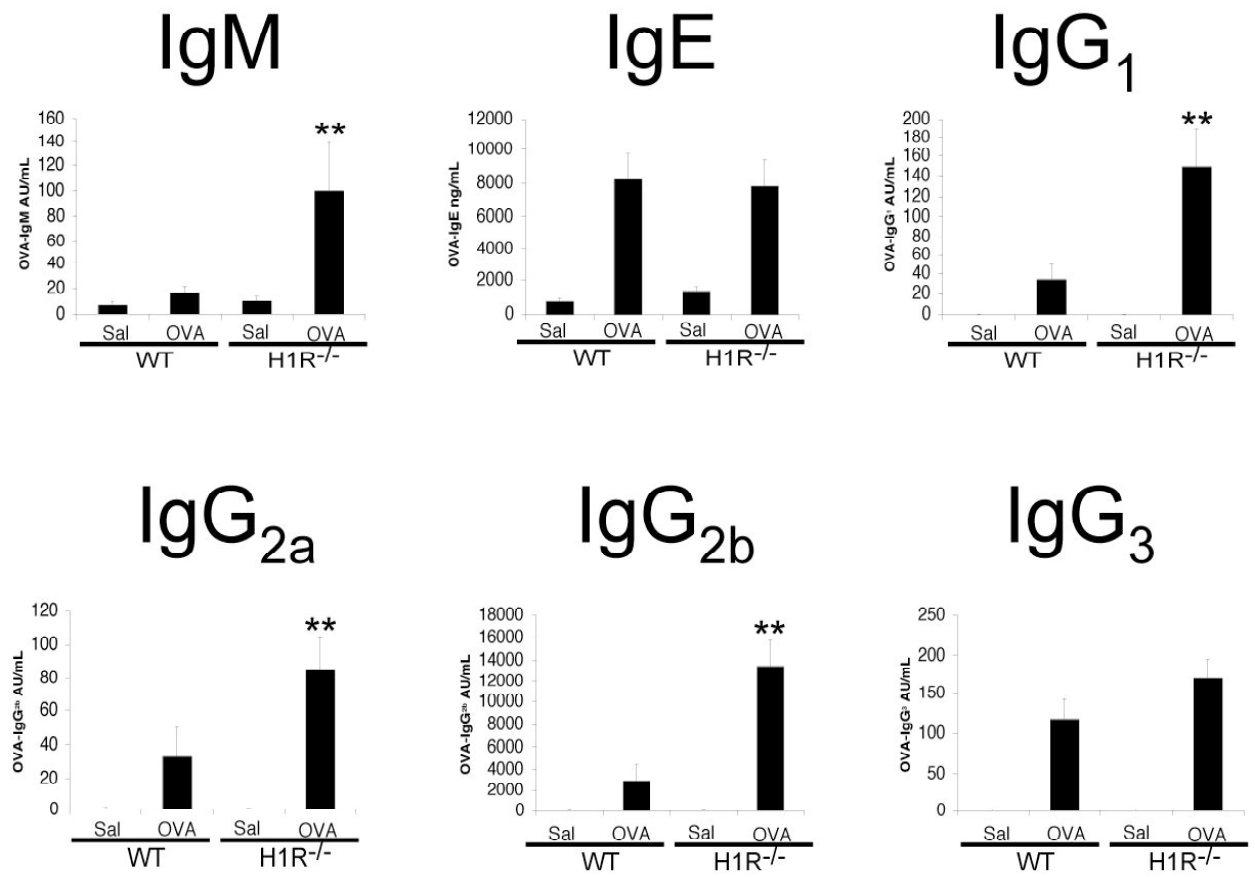

Supplemental Figure 3

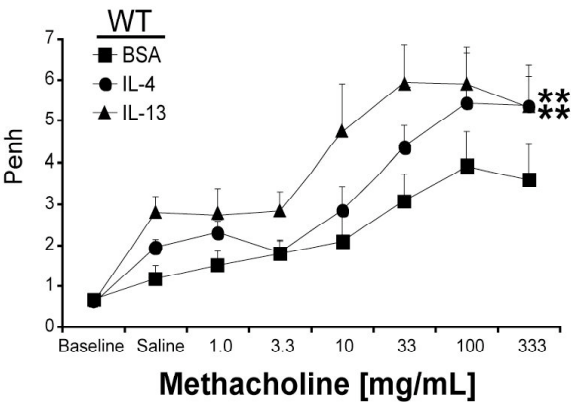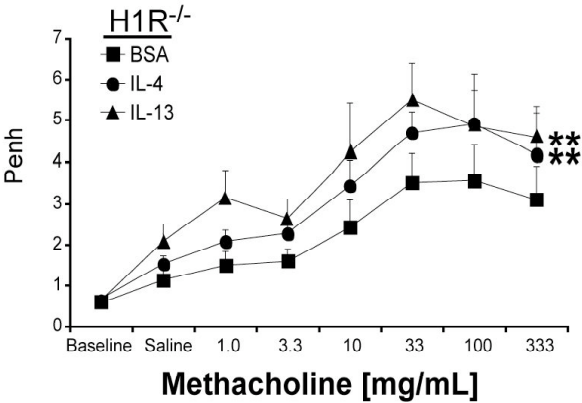

Supplemental Figure 4

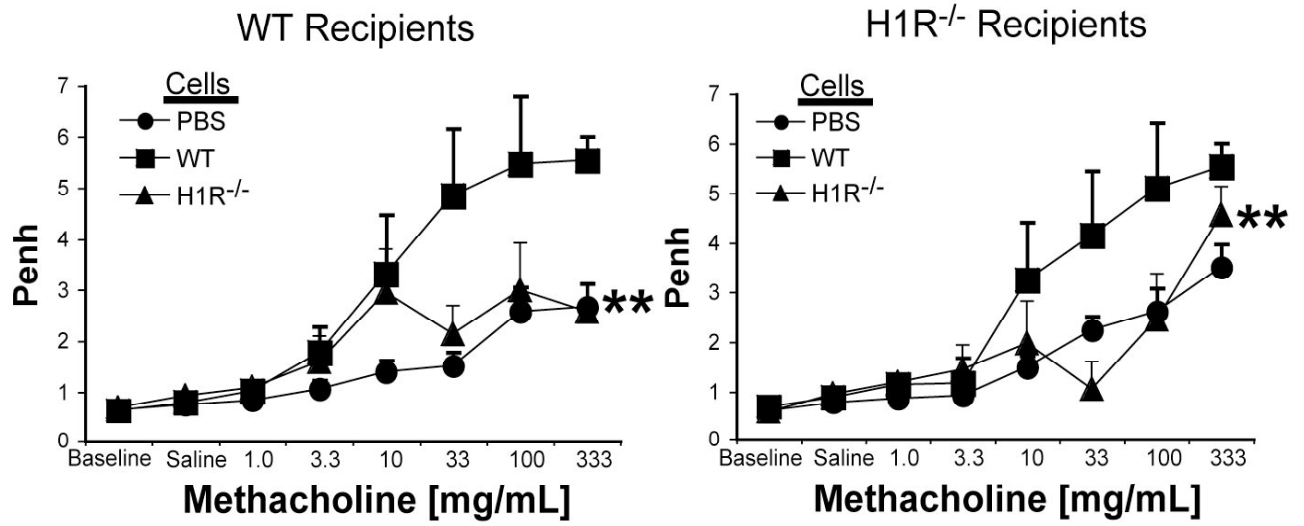

Supplemental Figure 1: H1R<sup>-/-</sup> mice do not develop inflammatory airway hyperresponsiveness to antigen.

OVA immunized (OVA) or sham immunized (Saline) WT or H1R<sup>-/-</sup> mice were exposed to OVA by inhalation and studied for airway hyperresponsiveness. Airway hyperresponsiveness to methacholine was determined by whole body plethysmography. Data represents mean Penh  $\pm$  SEM. n=9-10 mice. \*\* indicates p<0.01 by 2-tailed ANOVA.

Supplemental Figure 2: Dysregulated antibody isotype levels in H1R<sup>-/-</sup> mice

The levels of OVA-specific antibody levels in the serum of WT or H1R<sup>-/-</sup> mice was determined by ELISA, 31 days after *i.p.* immunization with OVA.

Supplemental Figure 3: IL-4 and IL-13 induce airway hyperresponsiveness in H1R<sup>-/-</sup> mice.

5 $\mu$ g of recombinant mouse IL-4 or IL-13 or 5 $\mu$ g of BSA was administered intranasally for 3 days. Airway hyperreactivity to methacholine in WT or H1R<sup>-/-</sup> mice was assessed by whole body plethysmography. Each group consisted of 5 individual mice. \*\* indicates p<0.01 by 2-tailed ANOVA.

Supplemental Figure 4: Airway hyperresponsiveness to antigen can be induced by WT T cells but not by H1R<sup>-/-</sup> T cells.

Antigen-expanded CD4<sup>+</sup> T cells from WT or H1R<sup>-/-</sup> mice were adoptively transferred into naïve WT or H1R<sup>-/-</sup> recipients and the development of airway hyperresponsiveness to methacholine in WT or H1R<sup>-/-</sup> recipients was studied after inhaled OVA challenge. Data represents mean Penh  $\pm$  SEM; n= 4-5/group.
